# Supplementary material for: Pathological pain processing in mouse models of multiple sclerosis and spinal cord injury: contribution of plasma membrane calcium ATPase 2 (PMCA2)
Source: PubMed Central journal article supplement (PMC6839084; doi:10.1186/s12974-019-1585-2), 2019-11-08
Supplement: 12974_2019_1585_MOESM1_ESM.pdf [file 12974_2019_1585_MOESM1_ESM.pdf]

## Additional Files

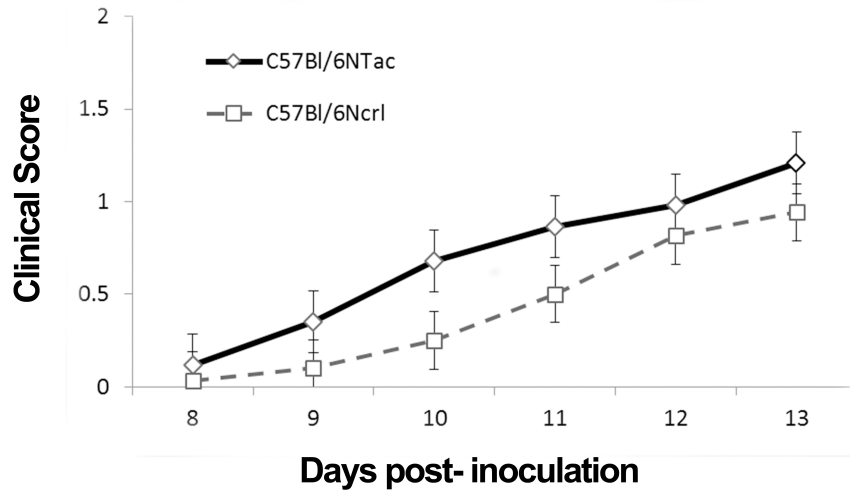

### **Additional file 1. Clinical scores at early EAE phase are comparable in C57Bl/6NTac and C57Bl/6Ncr1 mice**

Clinical scores were evaluated in C57Bl/6NTac and C57Bl/6Ncr1 mice side-by-side, as described in Methods. The graph shows the scores at early disease phase. Mice were evaluated for pain when they manifested flaccid tail (clinical score 1).
