# Supplementary material for: Pathological pain processing in mouse models of multiple sclerosis and spinal cord injury: contribution of plasma membrane calcium ATPase 2 (PMCA2)
Source: PubMed Central journal article supplement (PMC6839084; doi:10.1186/s12974-019-1585-2), 2019-11-08
Supplement: 12974_2019_1585_MOESM3_ESM.pdf [file 12974_2019_1585_MOESM3_ESM.pdf]

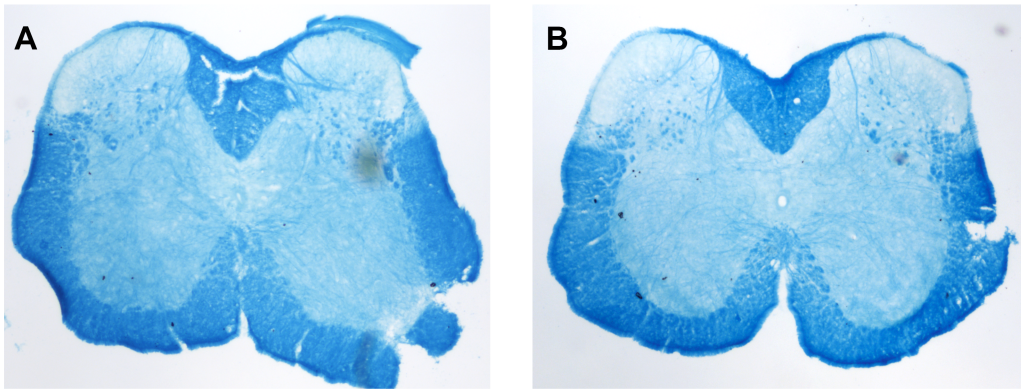

**Additional file 3. Absence of demyelination in the lumbar SC of C57Bl/6Ncr1 mice with EAE at early disease phase.**

Lumbar SC sections, obtained from A) CFA- or B) MOG<sub>35-55</sub>-inoculated C57Bl/6Ncr1 mice manifesting only flaccid tail, were stained with Luxol fast blue and revealed no demyelination.
