# Supplementary material for: Pathological pain processing in mouse models of multiple sclerosis and spinal cord injury: contribution of plasma membrane calcium ATPase 2 (PMCA2)
Source: PubMed Central journal article supplement (PMC6839084; doi:10.1186/s12974-019-1585-2), 2019-11-08
Supplement: 12974_2019_1585_MOESM4_ESM.pdf [file 12974_2019_1585_MOESM4_ESM.pdf]

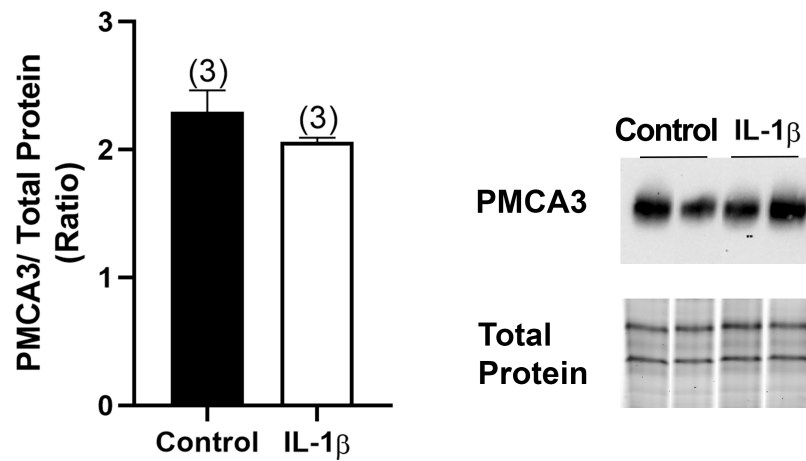

**Additional file 4. PMCA3 protein levels in neuronal cultures following IL-1 $\beta$  treatment.**

The graph (left panel) shows the quantification of the band intensity in the western blot (right panel; 2 representative lanes per group). Total protein was used to normalize for experimental variations. Values represent mean  $\pm$  SEM. There were no significant differences by independent Student's t-test.
