# Supplementary material for: Pathological pain processing in mouse models of multiple sclerosis and spinal cord injury: contribution of plasma membrane calcium ATPase 2 (PMCA2)
Source: PubMed Central journal article supplement (PMC6839084; doi:10.1186/s12974-019-1585-2), 2019-11-08
Supplement: 12974_2019_1585_MOESM6_ESM.pdf [file 12974_2019_1585_MOESM6_ESM.pdf]

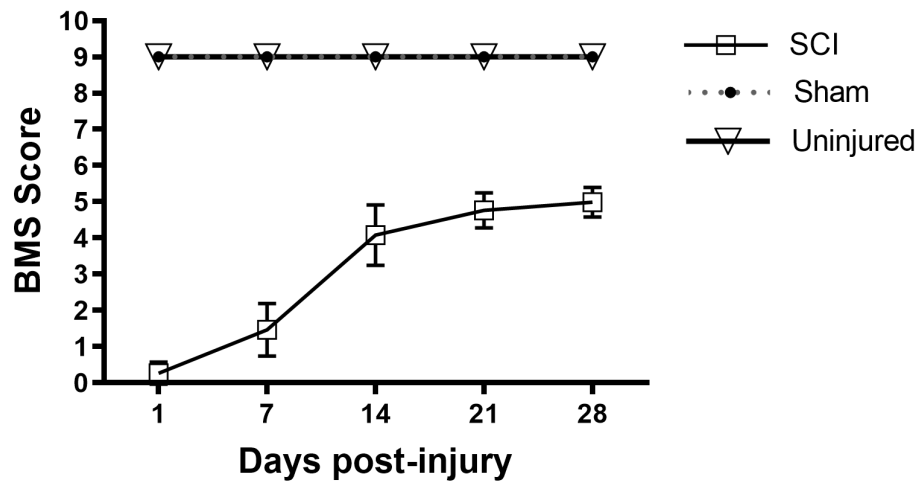

**Additional file 6. Open field locomotor function in C57Bl/6NTac mice following SCI.**

Open field locomotor function in female mice that sustained a mid-thoracic contusion injury was assessed using the BMS scale on 1, 7, 14, 21 and 28 dpi. Locomotor function in sham and uninjured mice was also assessed concomitantly.
