# Supplementary material for: Pathological pain processing in mouse models of multiple sclerosis and spinal cord injury: contribution of plasma membrane calcium ATPase 2 (PMCA2)
Source: PubMed Central journal article supplement (PMC6839084; doi:10.1186/s12974-019-1585-2), 2019-11-08
Supplement: 12974_2019_1585_MOESM7_ESM.pdf [file 12974_2019_1585_MOESM7_ESM.pdf]

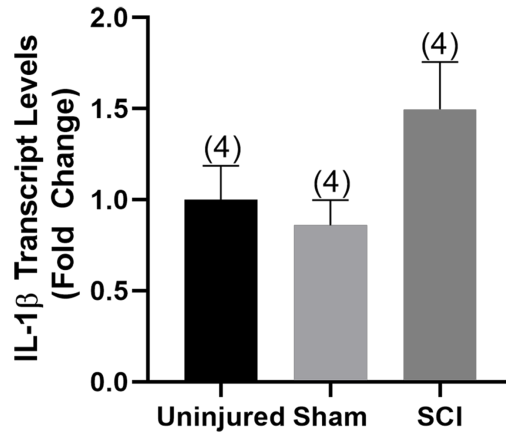

**Additional file 7. IL-1 $\beta$  levels are unaltered in the lumbar DH of C57Bl/6NTac mice following SCI**

Graph showing IL-1 $\beta$  transcript levels in the lumbar DH of female C57Bl/6NTac mice at 28 dpi. The number of mice in each group is shown above bars. Values represent mean  $\pm$  SEM. There were no significant differences by one-way ANOVA.
